# Supplementary material for: Sensitive and selective electrochemical detection of dopamine using an electrode modified with carboxylated carbonaceous spheres
Source: Royal Society of Chemistry journal article supplement (doi:10.1039/c3an36669c), 2013-01-01
Supplement: c3an36669c.pdf [file c3an36669c.pdf]

Supporting information of **“Sensitive and selective electrochemical detection of dopamine using an electrode modified with carboxylated carbonaceous spheres”**

**Preparation of thiol-functionalized carbonaceous spheres (thiol-CSs)**

As-prepared carboxylated carbonaceous spheres (10 mg) were uniformly dispersed into 5 ml DI water. Then, N-(3-dimethylamino propyl-N'-ethylcarbodiimide) hydrochloride (EDC, 30 mg) and N-hydroxysuccinimide (NHS, 18 mg) were added into the above solution at pH 5.6 and the mixture was sonicated for 15 min. Subsequently, 5 ml of the solution containing cysteamine (40 mg) was added into the above mixture and continuously stirred for 24 h at room temperature. Finally, the product of thiol-functionalized carbonaceous spheres (thiol-CSs) was obtained by centrifugation and washing several times with DI water to remove the excess reactant.

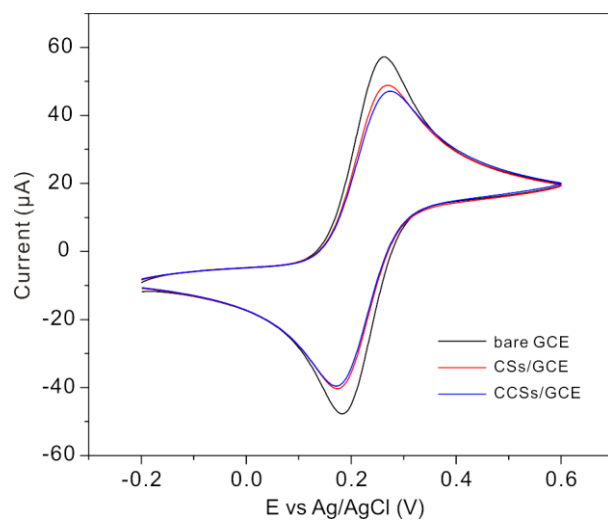

**Fig. S1.** Cyclic voltammograms of bare GCE, CSs/GCE and CCSs/GCE in 0.1 M KCl solution containing 5 mM  $[\text{Fe}(\text{CN})_6]^{3-/4-}$ . Scan rate: 50 mV s<sup>-1</sup>.

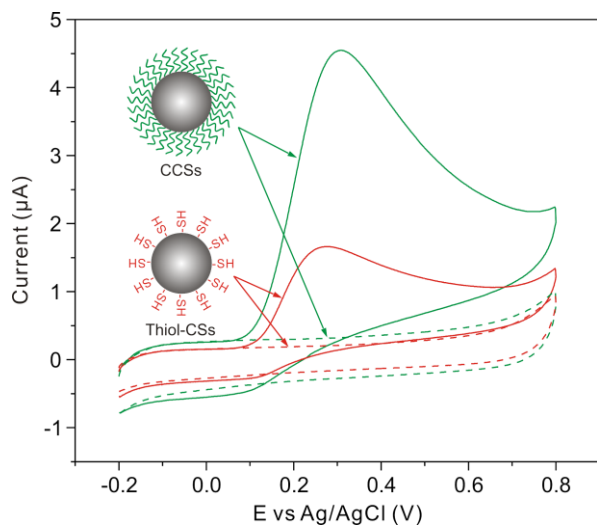

**Fig. S2.** Cyclic voltammograms of CCSs/GCE (green lines) and thiol-CSs/GCE (red lines) in 0.01 M PBS (pH = 7.4) with (solid lines) and without (dash lines) 10  $\mu$ M DA.

Scan rate: 50  $\text{mV s}^{-1}$ .

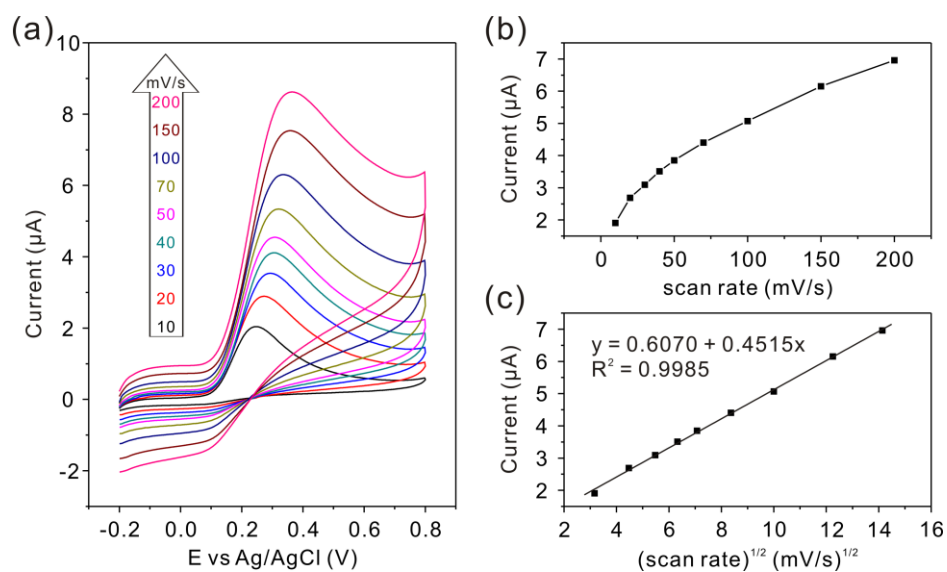

**Fig. S3.** (a) Cyclic voltammograms of CCSs/GCE toward 10 μM DA in 0.01 M PBS (pH = 7.4) at different scan rates (10, 20, 30, 40, 50, 70, 100, 150, and 200 mV s<sup>-1</sup>). (b) and (c) plots of anodic peak currents against the scan rate and the square root of scan rate, respectively.
